# Supplementary material
Source: PubMed Central journal article supplement (PMC7445412)
Supplement: jvz051_online_appendix.pdf [file jvz051_online_appendix.pdf]

# ONLINE APPENDIX TO: “AS THE WIND BLOWS: THE EFFECTS OF LONG-TERM EXPOSURE TO AIR POLLUTION ON MORTALITY”

---

**Michael L. Anderson**

University of California, Berkeley

---

---

E-mail: [mlanderson@berkeley.edu](mailto:mlanderson@berkeley.edu)

## Appendix

Table A.1: Effects of Frequency Downwind for Different Age Cutoffs

| Dependent Variable:                    | <u>3-yr mortality rate for 70+ year olds from:</u> |         |                    |         | <u>3-yr mortality rate for 65+ year olds from:</u> |         |                    |         | <u>3-yr mortality rate for 50+ year olds from:</u> |         |                    |         |
|----------------------------------------|----------------------------------------------------|---------|--------------------|---------|----------------------------------------------------|---------|--------------------|---------|----------------------------------------------------|---------|--------------------|---------|
|                                        | All causes                                         |         | Cardio-respiratory |         | All causes                                         |         | Cardio-respiratory |         | All causes                                         |         | Cardio-respiratory |         |
|                                        | (1)                                                | (2)     | (3)                | (4)     | (5)                                                | (6)     | (7)                | (8)     | (9)                                                | (10)    | (11)               | (12)    |
| Estimation method:                     | OLS                                                | 2SLS    | OLS                | 2SLS    | OLS                                                | 2SLS    | OLS                | 2SLS    | OLS                                                | 2SLS    | OLS                | 2SLS    |
| Frequency downwind                     | 0.041                                              | 0.048   | 0.032              | 0.032   | 0.028                                              | 0.033   | 0.026              | 0.022   | 0.003                                              | 0.005   | 0.002              | 0.000   |
|                                        | (0.016)                                            | (0.021) | (0.012)            | (0.016) | (0.012)                                            | (0.016) | (0.009)            | (0.012) | (0.007)                                            | (0.009) | (0.005)            | (0.006) |
| Effect of 1 SD change in freq downwind | 0.005                                              | 0.006   | 0.004              | 0.004   | 0.004                                              | 0.004   | 0.003              | 0.003   | 0.000                                              | 0.001   | 0.000              | 0.000   |
| Dependent variable mean                | 0.136                                              | 0.136   | 0.086              | 0.086   | 0.116                                              | 0.116   | 0.072              | 0.072   | 0.062                                              | 0.062   | 0.035              | 0.035   |
| N                                      | 9,810                                              | 9,810   | 9,810              | 9,810   | 10,232                                             | 10,232  | 10,232             | 10,232  | 10,776                                             | 10,776  | 10,776             | 10,776  |

*Notes:* Each cell represents a separate regression of the dependent variable on the percent of time spent downwind of a major highway (OLS) or instrumented percent of time spent downwind of a major highway (2SLS). The observation is the Census Block, and the sample is limited to Census Blocks with centroids between a minimum of 50 meters and a maximum of 600 meters from major highways. The instruments are a set of seven indicator variables summarizing orientation to the nearest major highway. Parentheses contain spatial standard errors with a 3,200 meter bandwidth. All regressions include controls for distance to highway, weather station fixed effects, 800 meter highway segment fixed effects, share African-American, and share over ages 50, 55, 60, 65, 70, and 75.

Table A.2: Heterogeneity of Effects by Weighting

| Dependent Variable:                    | <u>3-year mortality rate for 75+ year olds from:</u> |         |                    |         | N     |
|----------------------------------------|------------------------------------------------------|---------|--------------------|---------|-------|
|                                        | All causes                                           |         | Cardio-respiratory |         |       |
|                                        | (1)                                                  | (2)     | (3)                | (4)     |       |
| Estimation method:                     | OLS                                                  | 2SLS    | OLS                | 2SLS    |       |
| Baseline estimate                      | 0.064                                                | 0.066   | 0.044              | 0.036   | 9,027 |
|                                        | (0.018)                                              | (0.024) | (0.014)            | (0.019) |       |
| Effect of 1 SD change in freq downwind | 0.008                                                | 0.009   | 0.006              | 0.005   |       |
| <u>Weights:</u>                        |                                                      |         |                    |         |       |
| Total population                       | 0.064                                                | 0.053   | 0.057              | 0.043   | 9,027 |
|                                        | (0.017)                                              | (0.031) | (0.015)            | (0.026) |       |
| Effect of 1 SD change in freq downwind | 0.008                                                | 0.007   | 0.007              | 0.006   |       |
| Predicted population over 74           | 0.055                                                | 0.045   | 0.040              | 0.024   | 9,027 |
|                                        | (0.017)                                              | (0.027) | (0.014)            | (0.022) |       |
| Effect of 1 SD change in freq downwind | 0.007                                                | 0.006   | 0.005              | 0.003   |       |
| Actual population 50 to 74             | 0.055                                                | 0.045   | 0.040              | 0.024   | 8,997 |
|                                        | (0.017)                                              | (0.026) | (0.014)            | (0.022) |       |
| Effect of 1 SD change in freq downwind | 0.007                                                | 0.006   | 0.005              | 0.003   |       |
| Actual population over 74              | 0.043                                                | 0.043   | 0.026              | 0.017   | 9,027 |
|                                        | (0.013)                                              | (0.022) | (0.012)            | (0.020) |       |
| Effect of 1 SD change in freq downwind | 0.006                                                | 0.006   | 0.003              | 0.002   |       |

*Notes:* Each cell represents a separate regression of the dependent variable on the percent of time spent downwind of a major highway (OLS) or instrumented percent of time spent downwind of a major highway (2SLS). The observation is the Census Block, and the sample is limited to Census Blocks with centroids between a minimum of 25/50/100 meters (50 m is the baseline) and a maximum of 400/600/800 meters from major highways (600 m is the baseline). The instruments are a set of seven indicator variables summarizing orientation to the nearest major highway. Parentheses contain spatial standard errors with a 3,200 meter bandwidth. All regressions include controls for distance to highway, weather station fixed effects, highway segment fixed effects, share African-American, and share over ages 50, 55, 60, 65, 70, and 75.
