# Supplementary material
Source: PubMed Central journal article supplement (PMC7445412)
Supplement: jvz051_replication_files.pdf [file jvz051_replication_files.pdf]

# AS THE WIND BLOWS: THE EFFECTS OF LONG-TERM EXPOSURE TO AIR POLLUTION ON MORTALITY

---

**Michael L. Anderson**

University of California, Berkeley

---

## **Replication Files**

Michael L. Anderson, PhD, UC Berkeley (2019). "Replication data for: As the Wind Blows: The Effects of Long-Term Exposure to Air Pollution on Mortality", <https://doi.org/10.6078/D1P40V>.

The DOI can be accessed at the following website:

<https://doi.org/10.6078/D1P40V>

---

E-mail: [mlanderson@berkeley.edu](mailto:mlanderson@berkeley.edu)
